# Supplementary material for: Facile preparation of a variety of bimetallic dendrites with high catalytic activity by two simultaneous replacement reactions
Source: Royal Society of Chemistry journal article supplement (doi:10.1039/c3ra41268g), 2013-01-01
Supplement: c3ra41268g.pdf [file c3ra41268g.pdf]

## Supplementary Information

# Facile preparation of a variety of bimetallic dendrites with high catalytic activity by two simultaneous replacement reactions

Jun Liu, Qian Wu, Fuli Huang, Hefang Zhang, Shili Xu, Wei Huang, Zelin Li\*

Key Laboratory of Chemical Biology and Traditional Chinese Medicine Research (Ministry of Education of China), College of Chemistry and Chemical Engineering, Hunan Normal University, Changsha 410081 China

\* Corresponding author. Tel.: +86-731-88871533; fax: +86-731-88872531.

E-mail address: lizelin@hunnu.edu.cn (Z. L. Li).

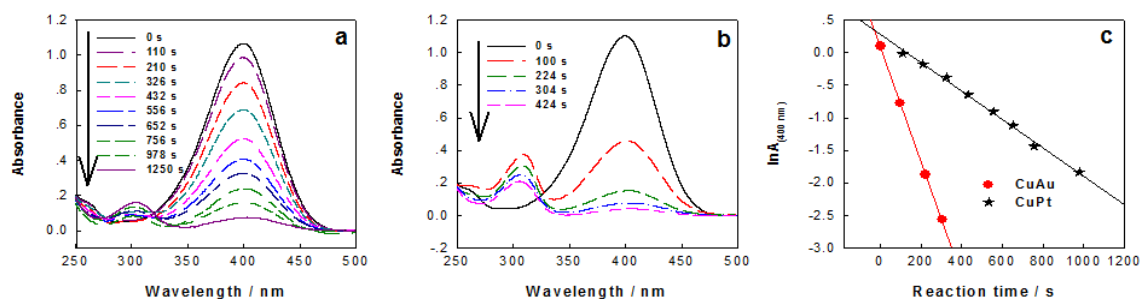

**Fig. S1** UV-vis adsorption spectra during catalytic reduction of 4-NP by  $\text{NaBH}_4$  in (a) 1950 mL of  $7 \times 10^{-5}$  M 4-NP + 50 mL of 0.2 M  $\text{NaBH}_4$  + 2 mg CuPt and (b) 200 mL of  $7 \times 10^{-5}$  M 4-NP + 10 mL of 0.2 M  $\text{NaBH}_4$  + 2 mg CuAu. (c) Plots of logarithm of absorbance at 400 nm vs. reaction time for the two systems, where the points of high and low absorbance were removed.

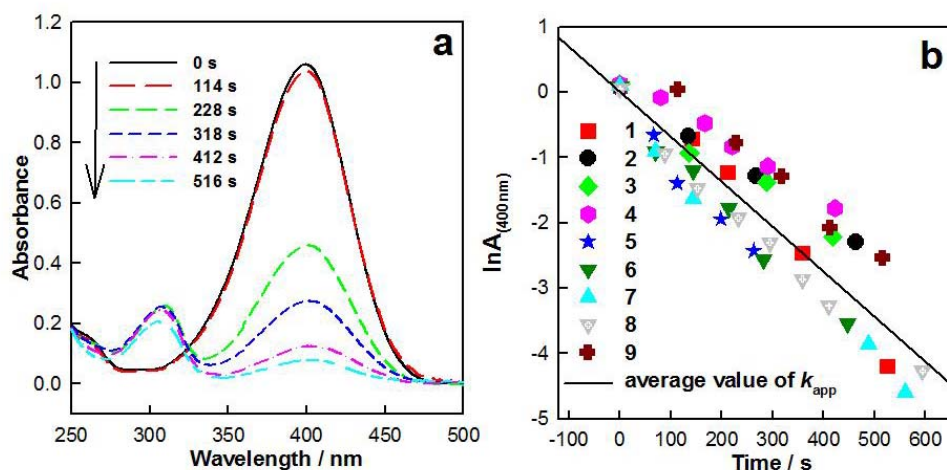

**Fig. S2** (a) UV-vis adsorption spectra for the catalytic reduction of 4-NP by NaBH<sub>4</sub> using 1 mg CuPd catalyst in 400 mL of  $7 \times 10^{-5}$  M 4-NP + 20 mL of 0.2 M NaBH<sub>4</sub>. (b) Plots of logarithm of absorbance at 400 nm vs. reaction time for the nine repeated experiments of CuPd catalyst, where the points of high and low absorbance were removed.

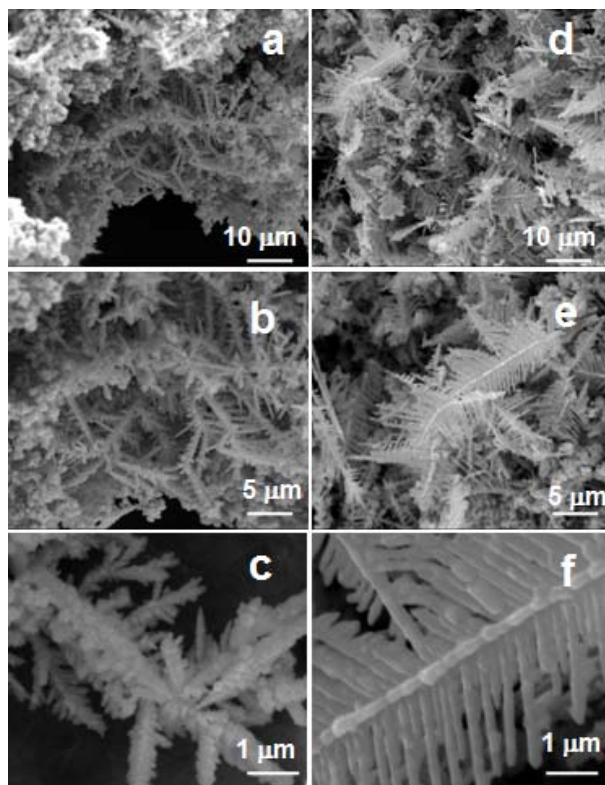

**Fig. S3** SEM images with different enlargement scales for the monometallic (a-c) Ag and (d-f) Cu dendrites.

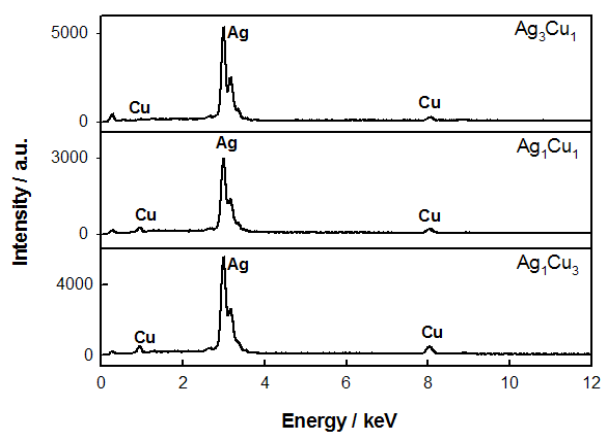

**Fig. S4** EDX spectra for the dendrites of  $\text{Ag}_3\text{Cu}_1$ ,  $\text{Ag}_3\text{Cu}_1$  and  $\text{Ag}_3\text{Cu}_1$  in Fig. 1.

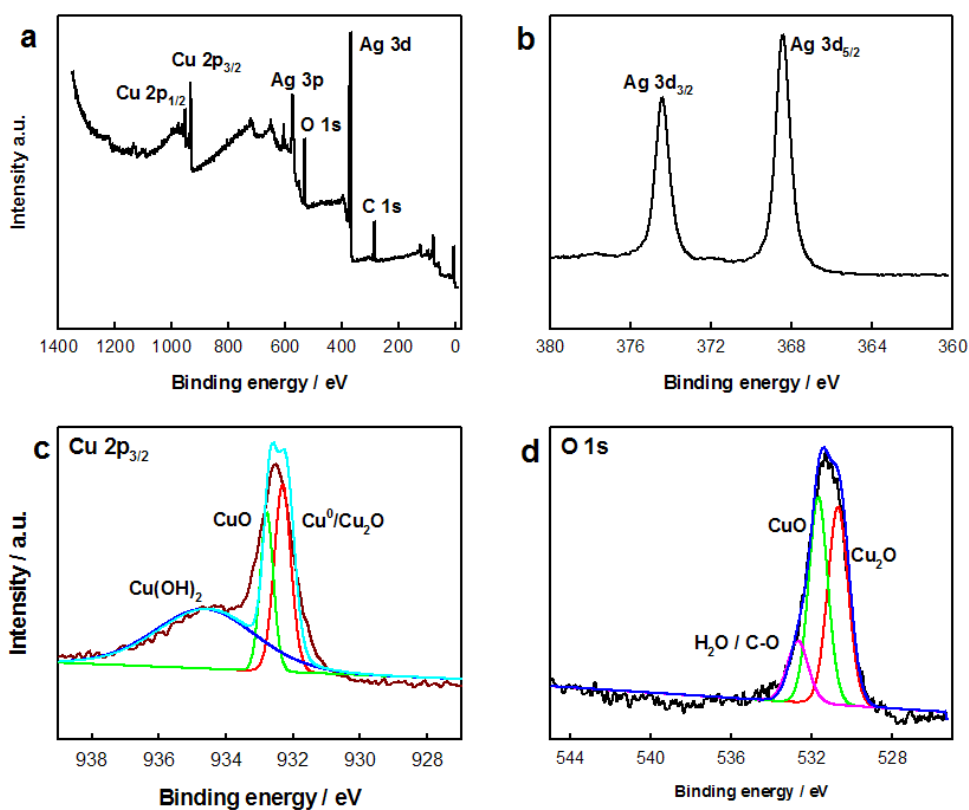

**Fig. S5** XPS of the  $\text{Ag}_1\text{Cu}_1$  catalyst. (a) A survey spectrum, (b) Ag 3d, (c) Cu 2p<sub>3/2</sub> and (d) O 1s.

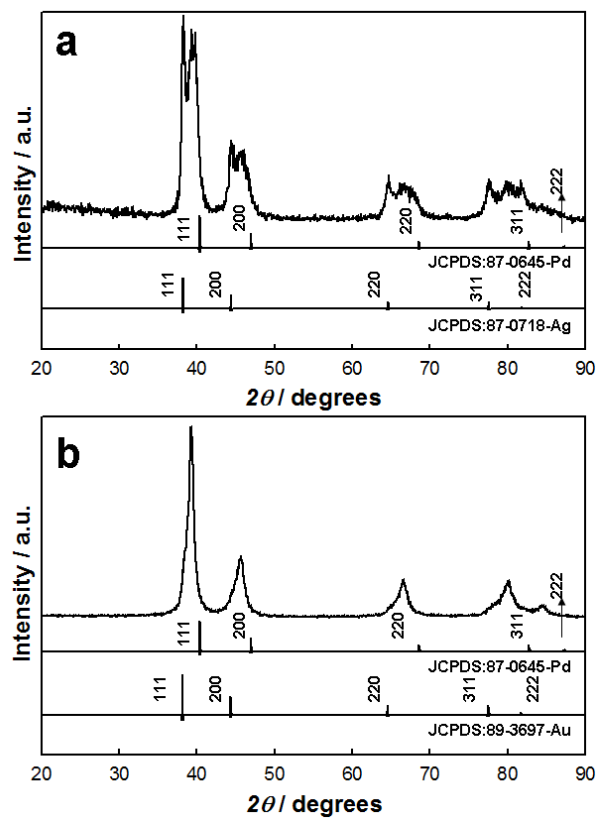

**Fig. S6** XRD patterns for the prepared bimetallic dendrites of (a) AgPd and (b) AuPd in Fig. 7a and 7b, respectively.

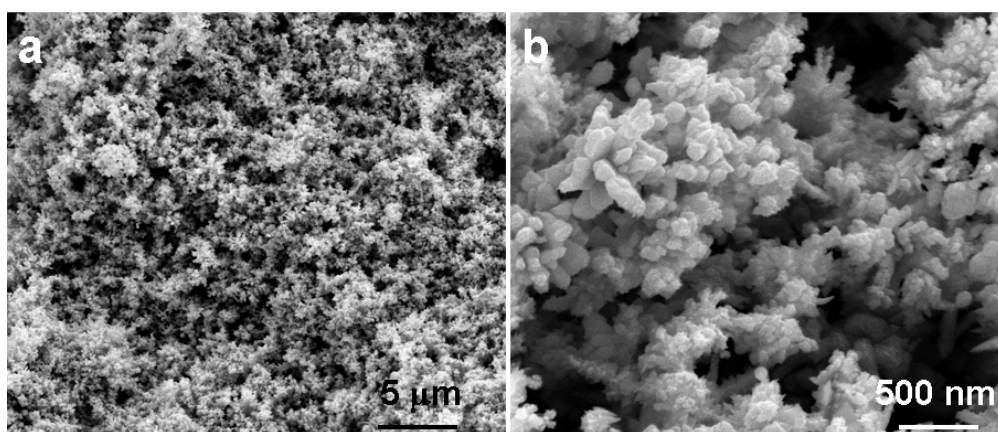

**Fig. S7** SEM images with different enlargement scales for the prepared monometallic Pd.

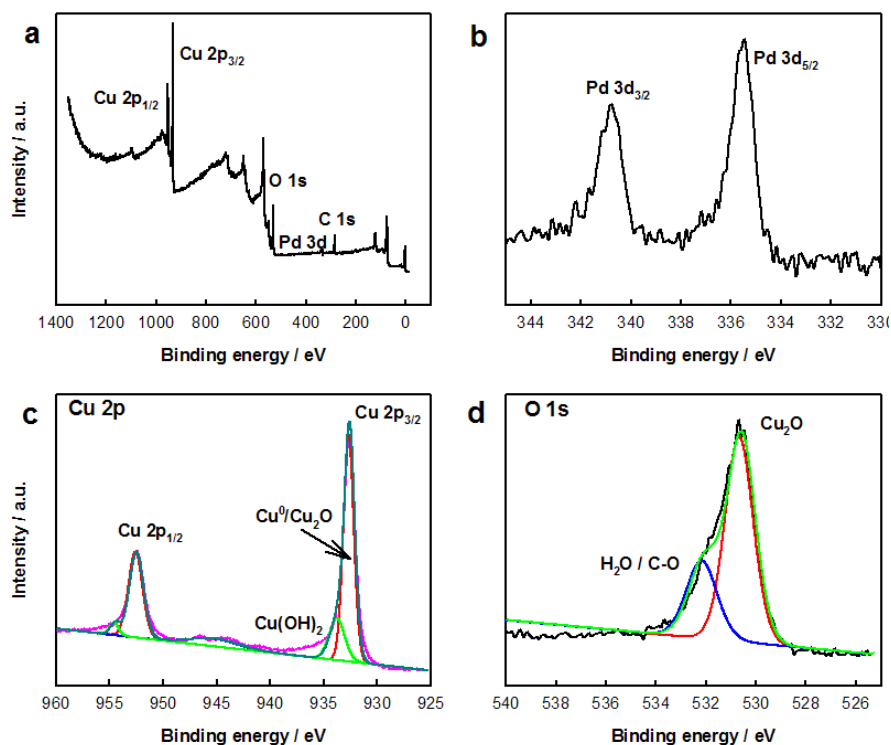

**Fig. S8** XPS spectra of the CuPd catalyst. (a) A survey spectrum, (b) Pd 3d, (c) Cu 2p and (d) O 1s.

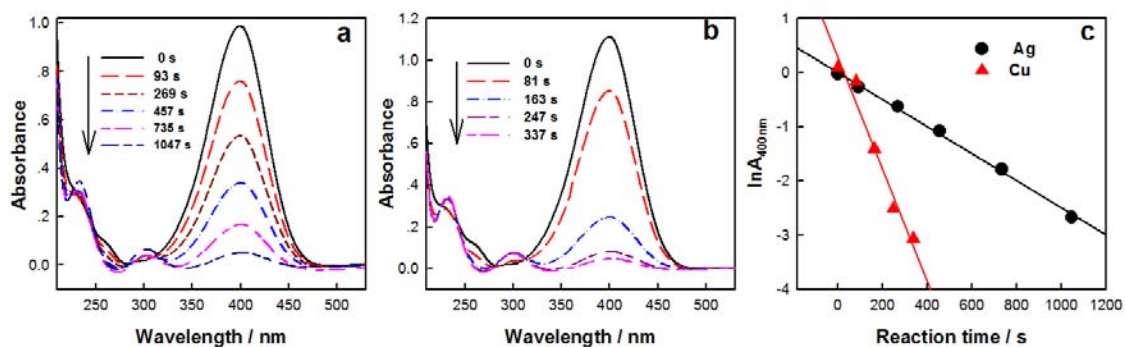

**Fig. S9** UV-vis adsorption spectra during the reduction of 4-NP by NaBH<sub>4</sub> in the presence of monometallic dendrites of (a) Ag and (b) Cu. (c) Plots of logarithm of absorbance at 400 nm vs. reaction time for the two monometallic dendrites.

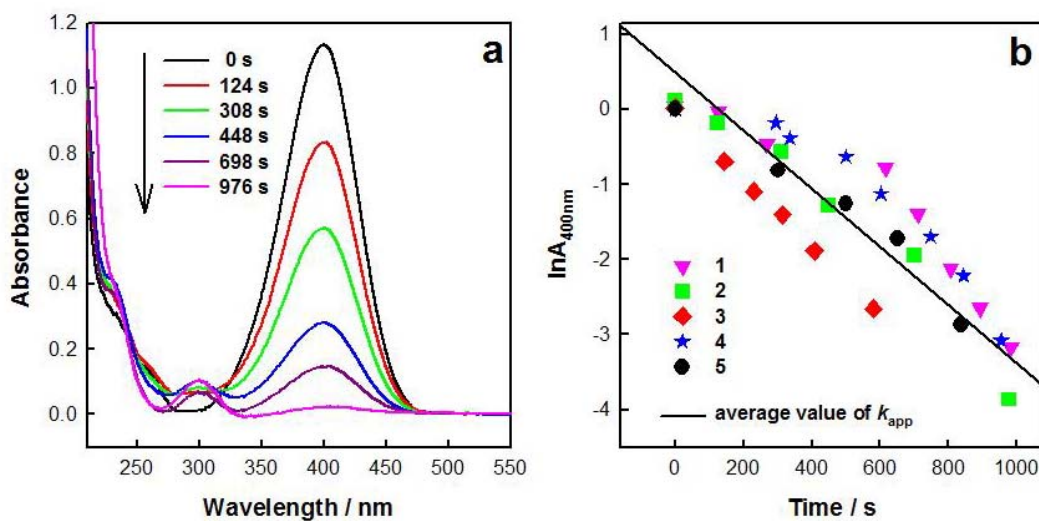

**Fig. S10** (a) UV-vis adsorption spectra for the catalytic reduction of 4-NP by NaBH<sub>4</sub> using 2 mg Pd catalyst in 400 mL of  $7 \times 10^{-5}$  M 4-NP + 20 mL of 0.2 M NaBH<sub>4</sub>. (b) Plots of logarithm of absorbance at 400 nm vs. reaction time for five repeated experiments, where the points of high and low absorbance were removed.

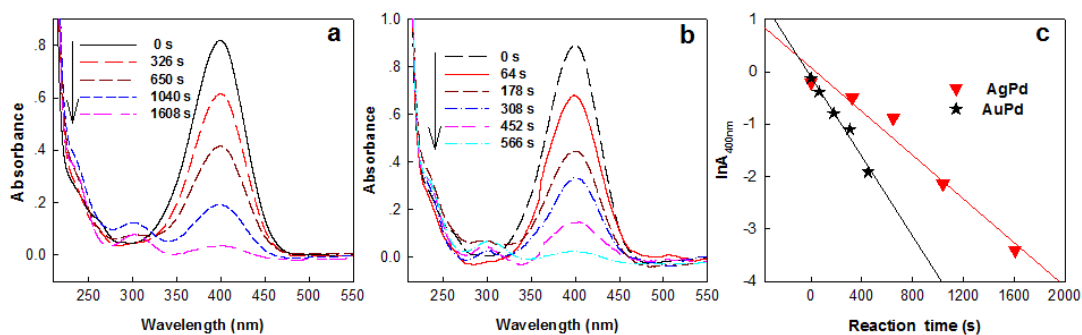

**Fig. S11** UV-vis adsorption spectra during reduction of 4-NP by NaBH<sub>4</sub> in the presence of (a) AgPd and (b) AuPd dendrites. (c) Plots of logarithm of absorbance at 400 nm vs. reaction time for the two dendrites.

**Table S1.** Some relevant standard potentials vs. SHE from the handbook [S1].

|                          |                      |                                                      |                |                                      |                                    |
|--------------------------|----------------------|------------------------------------------------------|----------------|--------------------------------------|------------------------------------|
| Redox pair               | Ag <sup>+</sup> /Ag  | Ag(NH <sub>3</sub> ) <sub>2</sub> <sup>+</sup> /Ag   | Ag(I)EDTA/Ag*  | Pd <sup>2+</sup> /Pd                 | AuCl <sub>4</sub> <sup>-</sup> /Au |
| <i>E</i> <sup>0</sup> /V | 0.799                | 0.373                                                | 0.366          | 0.951                                | 1.002                              |
| Redox pair               | Cu <sup>2+</sup> /Cu | Cu(NH <sub>3</sub> ) <sub>4</sub> <sup>2+</sup> /Cu* | Cu(II)EDTA/Cu* | PtCl <sub>6</sub> <sup>2-</sup> /Pt* | Mg <sup>2+</sup> /Mg               |
| <i>E</i> <sup>0</sup> /V | 0.342                | -0.00178                                             | -0.214         | 0.718                                | -2.37                              |

\*The standard electrode potential of PtCl<sub>6</sub><sup>2-</sup>/Pt was calculated from that of PtCl<sub>4</sub><sup>2-</sup>/Pt and PtCl<sub>6</sub><sup>2-</sup>/PtCl<sub>4</sub><sup>2-</sup> couples [S1]. The standard electrode potential of Cu(NH<sub>3</sub>)<sub>4</sub><sup>2+</sup>/Cu was calculated from that of Cu<sup>2+</sup>/Cu and the stability constants of Cu(NH<sub>3</sub>)<sub>4</sub><sup>2+</sup> (*K*<sup>0</sup>) according to

$$E^0[\text{Cu}(\text{NH}_3)_4^{2+}/\text{Cu}] = E^0(\text{Cu}^{2+}/\text{Cu}) + (0.05916/2) \log (1/K^0)$$

The standard electrode potentials of Ag(I)EDTA/Ag and Cu(II)EDTA/Cu were also obtained in the same way.

**Table S2.** The atomic percentage of Ag (at.%) in the feeding solutions and AgCu bimetallic dendrites.

| Sample                          | Feeding solution | Dendrite |
|---------------------------------|------------------|----------|
| Ag <sub>3</sub> Cu <sub>1</sub> | 75.00            | 90.01    |
| Ag <sub>1</sub> Cu <sub>1</sub> | 50.00            | 81.66    |
| Ag <sub>1</sub> Cu <sub>3</sub> | 25.00            | 77.98    |

**Table S3.** 2θ angles (in degree) of the prepared bimetallic AgCu dendrites.

| Sample                          | Ag(111) | Ag(200) | Ag(220) | Ag(311) | Ag(222) | Cu(111) | Cu(200) | Cu(220) | Cu(311) |
|---------------------------------|---------|---------|---------|---------|---------|---------|---------|---------|---------|
| Ag <sub>1</sub> Cu <sub>3</sub> | 38.09   | 44.19   | 64.35   | 77.55   | 81.61   | 43.19   | 50.29   | 74.16   | 89.92   |
| Ag <sub>1</sub> Cu <sub>1</sub> | 38.09   | 44.19   | 64.35   | 77.55   | 81.61   | /       | /       | 74.16   | /       |
| Ag <sub>3</sub> Cu <sub>1</sub> | 38.09   | 44.19   | 64.35   | 77.55   | 81.61   | /       | /       | /       | /       |

**Table S4. Some relevant stability constants [S2].**

| Complex                   | Ag(NH <sub>3</sub> ) <sub>2</sub> <sup>+</sup> | Cu(NH <sub>3</sub> ) <sub>4</sub> <sup>2+</sup> | Ag(I)EDTA | Cu(II)EDTA |
|---------------------------|------------------------------------------------|-------------------------------------------------|-----------|------------|
| log <i>K</i> <sup>θ</sup> | 7.23                                           | 12.67                                           | 7.32      | 18.80      |

**Table S5. Comparison of normalized kinetic parameters (*k<sub>n</sub>*) for the reduction of 4-NP reported in literature**

| Reference | Catalyst                              | <i>m</i> / 10 <sup>-3</sup> g | <i>V</i> / mL | <i>c</i> <sub>0</sub> / mM | <i>k</i> <sub>app</sub>                    | <i>k<sub>n</sub></i> / 10 <sup>-3</sup><br>mmol g <sup>-1</sup> s <sup>-1</sup> |
|-----------|---------------------------------------|-------------------------------|---------------|----------------------------|--------------------------------------------|---------------------------------------------------------------------------------|
| 4         | Ag dendrites                          | 1.00                          | 2.8           | 7.1 × 10 <sup>-2</sup>     | 10.4 × 10 <sup>-3</sup> s <sup>-1</sup>    | 2.07                                                                            |
|           | Pd-Ag dendrites                       |                               |               |                            | 39.1 × 10 <sup>-3</sup> s <sup>-1</sup>    | 7.77                                                                            |
|           | Pd-Ag particles                       |                               |               |                            | 8.3 × 10 <sup>-3</sup> s <sup>-1</sup>     | 1.65                                                                            |
|           | Au-Ag dendrites                       |                               |               |                            | 10.7 × 10 <sup>-3</sup> s <sup>-1</sup>    | 2.13                                                                            |
| 53        | Ni <sub>33.8</sub> Co <sub>66.2</sub> | 1.00                          | 10            | 0.1                        | 0.07348 min <sup>-1</sup>                  | 1.23                                                                            |
|           | Ni <sub>33.4</sub> Co <sub>66.6</sub> |                               |               |                            | 0.05717 min <sup>-1</sup>                  | 0.953                                                                           |
| 54        | RGO-Co                                | 6.00                          | 2             | 5                          | 27.16 × 10 <sup>-3</sup> min <sup>-1</sup> | 0.754                                                                           |
|           | RGO-Ni <sub>25</sub> Co <sub>75</sub> |                               |               |                            | 93.22 × 10 <sup>-3</sup> min <sup>-1</sup> | 2.59                                                                            |
|           | RGO-Ni <sub>50</sub> Co <sub>50</sub> |                               |               |                            | 7.73 × 10 <sup>-3</sup> min <sup>-1</sup>  | 0.215                                                                           |
|           | RGO-Ni <sub>75</sub> Co <sub>25</sub> |                               |               |                            | 29.06 × 10 <sup>-3</sup> min <sup>-1</sup> | 0.807                                                                           |
|           | RGO-Ni                                |                               |               |                            | 37.26 × 10 <sup>-3</sup> min <sup>-1</sup> | 1.04                                                                            |
| 55        | Au/Ag-8 min                           | 0.60                          | 2.8           | 7.10 × 10 <sup>-2</sup>    | 6.07 × 10 <sup>-3</sup> s <sup>-1</sup>    | 2.01                                                                            |
| 56        | Au-replicas(fresh)                    | 0.30                          | 100           | 7.82 × 10 <sup>-3</sup>    | 23.5 × 10 <sup>-2</sup> min <sup>-1</sup>  | 10.2                                                                            |
|           | Au-replicas<br>(recycled)             |                               |               |                            | 16.7 × 10 <sup>-2</sup> min <sup>-1</sup>  | 7.25                                                                            |
| 57        | Au-Fe <sub>3</sub> O <sub>4</sub>     | 2.00                          | 0.04          | 10                         | 0.63 min <sup>-1</sup>                     | 2.10                                                                            |
| 58        | Ni                                    | 8.00                          | 3             | 0.1                        | 3.5 × 10 <sup>-2</sup> min <sup>-1</sup>   | 0.022                                                                           |
|           | Ni@Au-30 min                          |                               |               |                            | 4.1 × 10 <sup>-2</sup> min <sup>-1</sup>   | 0.026                                                                           |
|           | Ni@Au-4 h                             |                               |               |                            | 7.6 × 10 <sup>-2</sup> min <sup>-1</sup>   | 0.048                                                                           |
|           | Ni@Au-12 h                            |                               |               |                            | 4.2 × 10 <sup>-3</sup> min <sup>-1</sup>   | 0.0026                                                                          |

*c*<sub>0</sub>: initial concentration of 4-NP, *V*: volume of 4-NP solution, *m*: weight of catalyst.

## References

- S1 D. R. Lide, *CRC Handbook of Chemistry and Physics*, ed. P. Vanýsek, CRC Press: Boca Raton, FL, 87th edn., 2006/2007, Vol. 8, Iss. 8, pp. 20-29.
- S2 Groups in Central China Normal University, Northeast Normal University; Shaanxi Normal University and Beijing Normal University, *Analytical Chemistry (3rd edn. of Chinese version)*, Higher Education Press: Beijing, 2006, Vol. 1, pp. 344-345.
